# Supplementary material for: Engineering 3D-printed carbon structures with atomic layer deposition coatings as photoelectrocatalysts for water splitting
Source: Royal Society of Chemistry journal article supplement (doi:10.1039/d3ta04460b), 2023-12-05
Supplement: d3ta04460b1.pdf [file d3ta04460b1.pdf]

Electronic Supplementary Information (ESI)

## **Engineering 3D-printed carbon structures with atomic layer deposition coatings as photoelectrocatalysts for water splitting**

Siowwoon Ng,<sup>a</sup> Michela Sanna,<sup>a</sup> Edurne Redondo<sup>a</sup> and Martin Pumera<sup>\*abcde</sup>

<sup>a</sup> Future Energy and Innovation Laboratory, Central European Institute of Technology, Brno University of Technology, Purkyňova 123, 61200 Brno, Czech Republic

<sup>b</sup> Faculty of Electrical Engineering and Computer Science, VSB – Technical University of Ostrava, 17. Listopadu 2172/15, Ostrava 70800, Czech Republic

<sup>c</sup> Department of Medical Research, China Medical University Hospital, China Medical University, No. 91 Hsueh-Shih Road, Taichung 40402, Taiwan

<sup>d</sup> Department of Chemical and Biomolecular Engineering, Yonsei University, 50 Yonsei-ro, Seodaemun-gu, Seoul 03722, South Korea

<sup>e</sup> Department of Paediatrics and Inherited Metabolic Disorders, First Faculty of Medicine, Charles University, Ke Karlovu 2, 12808 Prague, Czech Republic

\*Corresponding author email: [martin.pumera@ceitec.vutbr.cz](mailto:martin.pumera@ceitec.vutbr.cz)

Keywords: additive manufacturing, fused deposition modeling, water splitting, scaling up, TiO<sub>2</sub>, SiO<sub>2</sub>, Al<sub>2</sub>O<sub>3</sub>

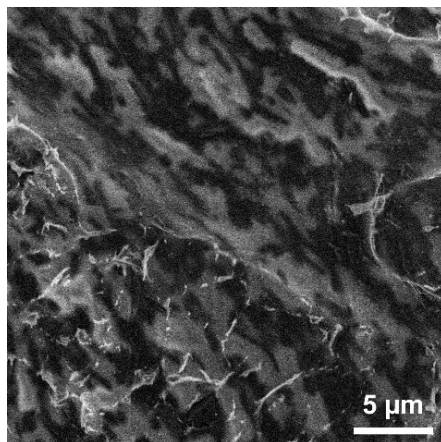

**Figure S1.** SEM image of an as-printed 3D carbon electrode.

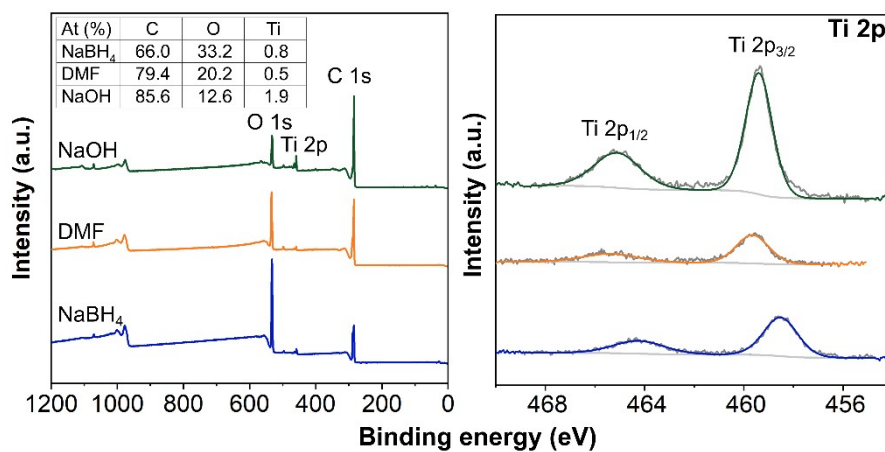

**Figure S2.** XPS survey and high-resolution Ti 2p spectra of 500 ALD cycles TiO<sub>2</sub> coated 3D carbon electrodes activated by different solvents, *i.e.*, NaBH<sub>4</sub>, DMF, and NaOH. The table in the inset shows the atomic concentration (at %) of C, O, and Ti obtained from the survey spectra.

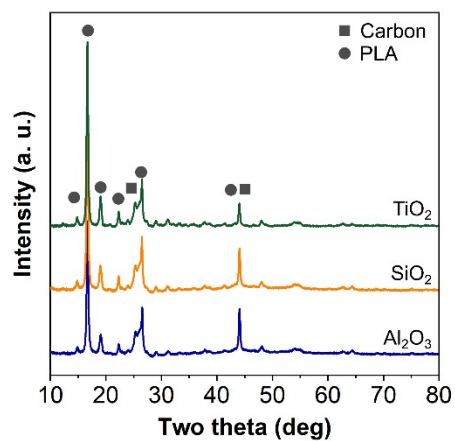

**Figure S3.** XRD patterns of ALD coated 3D carbon electrodes, i.e., 50 cycles  $\text{Al}_2\text{O}_3$ , 50 cycles  $\text{SiO}_2$ , and 1500 cycles  $\text{TiO}_2$ .

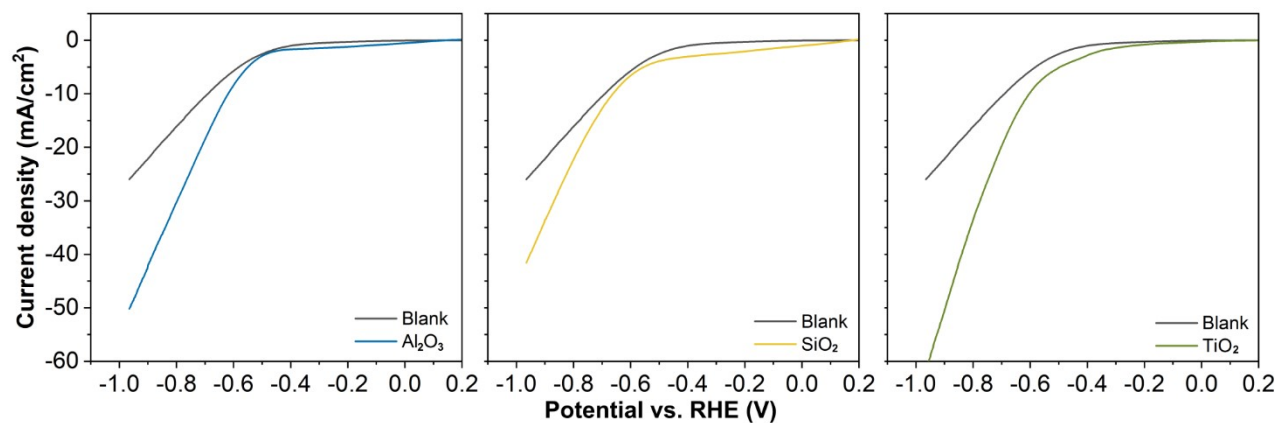

**Figure S4.** LSV curves for HER in 0.5 M  $\text{H}_2\text{SO}_4$  electrolyte showing the effect of ALD coated electrodes, i.e., 50 cycles  $\text{Al}_2\text{O}_3$ , 50 cycles  $\text{SiO}_2$ , and 1500 cycles  $\text{TiO}_2$ .

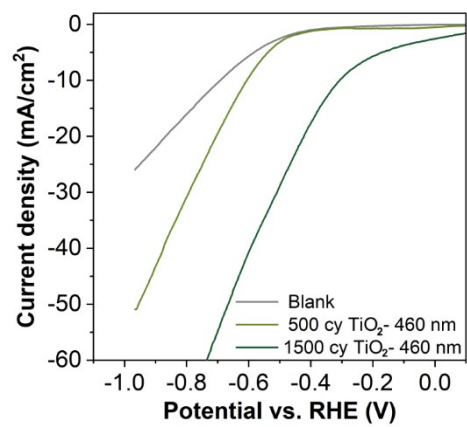

**Figure S5.** LSV curves for HER in 0.5 M H<sub>2</sub>SO<sub>4</sub> electrolyte for blank, 500 and 1500 ALD cycles TiO<sub>2</sub> coated 3D carbon electrodes.
